# Supplementary material for: Effects of Maternal Supplementation with Organic Trace Minerals including Zinc, Manganese, Copper, and Cobalt during the Late and Post-Partum Periods on the Health and Immune Status of Japanese Black Calves
Source: MDPI journal article supplement (doi:10.3390/ani13233679), 2023-11-28
Supplement: s1 [file s1]

## Supplementary Materials

**Table S1.** Nutrient composition

| Item                               | Last Trimester of Pregnancy     | Lactation Period                  | AI Period        |
|------------------------------------|---------------------------------|-----------------------------------|------------------|
|                                    | (Stanchion Barn→ Private Stall) | (Private Stall for breastfeeding) | (Stanchion Herd) |
| Dry Matter Intake (DM %)           | 115                             | 118                               | 106              |
| Total Digestible Nutrients (TDN %) | 124~125                         | 125                               | 116              |
| Crude Protein (CP %)               | 113~127                         | 113                               | 111              |
| Formulated Feed A                  | 3~5 kg                          | 5 kg                              | 2 kg             |
| Forages A                          | 0 or 2 kg                       |                                   |                  |
| Home-Grown Silages A               | 6 kg                            | 6 kg                              | 6 kg             |
| Home-Grown Silages B               | 2 kg                            | 2 kg                              |                  |
| Grass                              |                                 |                                   | 2 kg             |
| Total mixed rations (TMR)          |                                 |                                   | 2 kg             |

Artificial insemination (AI).

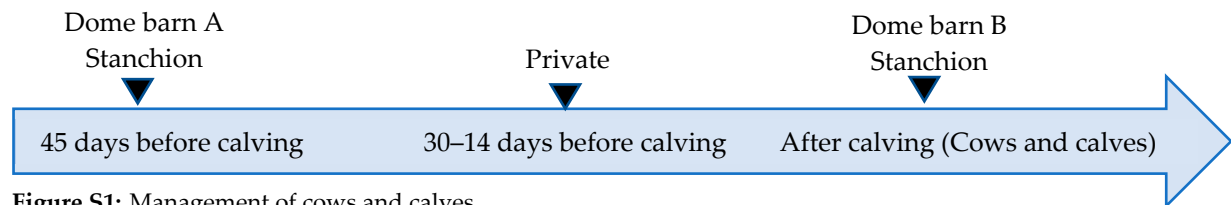

**Figure S1:** Management of cows and calves

**Table S2.** The area for each cow and calves .

|                | Dome Barn A left.                         | Dome Barn B left                        | Delivery Room                 |
|----------------|-------------------------------------------|-----------------------------------------|-------------------------------|
| Space          | 10 m × 21 m = 210 m <sup>2</sup>          | 5 m × 21 m = 105 m <sup>2</sup>         | 3 m × 6 m = 18 m <sup>2</sup> |
| Number of Cows | 10–15 cows (accommodate up to 24 animals) | 7–8 cows (accommodate up to 15 animals) |                               |
| Area / Head    | 14–21 m <sup>2</sup> (10–15 heads)        | 13.125–15 m <sup>2</sup> (7–8 heads)    | 18 m <sup>2</sup>             |

The area of dome cowshed A and calving room is calculated for dome barn A left 10 m × 21 m = 210 m<sup>2</sup>, holds 10 to 15 cows (Can accommodate up to 24 animals). Area per head: 14–21 m<sup>2</sup> (10–15 heads). Dome barn B left: 5 m × 21 m = 105 m<sup>2</sup>, holds 7 to 8 cows (Can accommodate up to 15 animals). Area per head: 13.125–15 m<sup>2</sup> (7–8 heads). In addition, Delivery room: 3 m × 6m = 18 m<sup>2</sup> and area per head: 18 m<sup>2</sup>.
